# Supplementary material
Source: PubMed Central journal article supplement (PMC3781382)
Supplement: supp_mol.113.087106_Supplementary_Material_87106.pdf [file supp_mol.113.087106_Supplementary_Material_87106.pdf]

## Supplementary Material for Molecular Pharmacology MOL #87106

**Full Title:** Constitutive knockout of Kalirin-7 leads to increased rates of cocaine self-administration

**Authors:** Drew D. Kiraly, Natali E. Nemirovsky, Taylor P. LaRese, Seven E. Tomek, Stephanie L. Yahn, M. Foster Olive, Betty A. Eipper, Richard E. Mains

**Fig. S1. No effect of prior behavioral experience on cocaine responding.** To reduce animal waste, some cohorts of animals were used for other behavioral tests prior to initiation of the cocaine protocol. RM-ANOVA analysis revealed no significant effect of protocol ( $F_{(2,38)}=0.83$ ;  $p=0.44$ ). There was a significant effect of Day ( $F_{(9,342)}=2.30$ ;  $p=0.02$ ), but no significant interaction between variables ( $F_{(18,342)}=1.44$ ;  $p=0.11$ ). [N=18 cocaine only, 12 saline first, 11 food first]

**Fig. S2. Effect of dose/infusion on cocaine self-administration.** The total dose of cocaine administered per session is plotted for the three different infusion doses. Note the use of a  $\text{Log}_{10}$  scale for the Y-axis on this graph only.

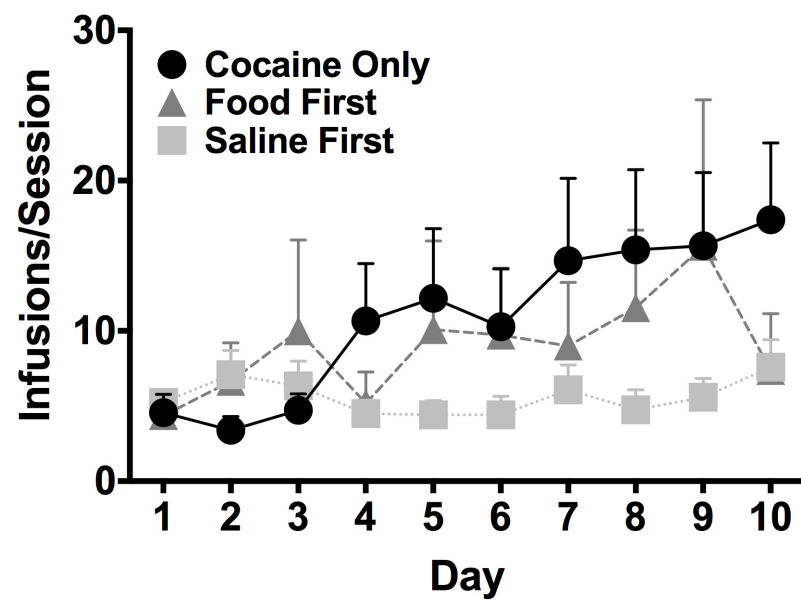

Fig. S1

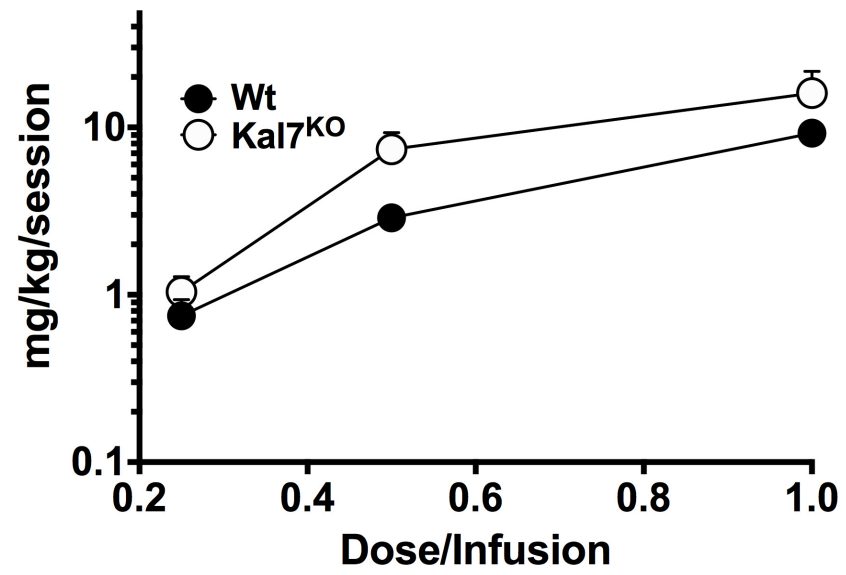

Fig. S2
